# Supplementary material
Source: Springer Nature journal article supplement (https://www.springermedizin.de/resource/supplementary/13063_2012_1249_MOESM12_ESM.pdf/9620466)

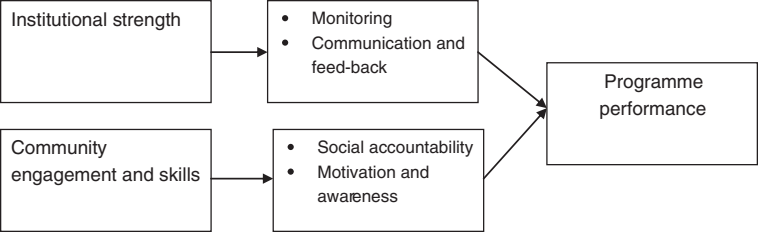

Supplement: MOESM12 [file 9620466]
